# Supplementary material
Source: MDPI journal article supplement (https://www.mdpi.com/2311-7524/10/5/483)
Supplement: s1 [file s1]

Table S1. Desulfo-glucosinolates isolated from extracts of *Eruca sativa* while maintaining different levels of substrate volumetric water content (0.50, 0.40, 0.30, and 0.20 m<sup>3</sup>·m<sup>-3</sup>) using a soil moisture sensor-based automated irrigation system.

| Peak No. | Retention time (min) | Structure of R-groups                                                                | Trivial name                                                               | Molecular Weight | Characteristic ions (m/z) | Response factor   |
|----------|----------------------|--------------------------------------------------------------------------------------|----------------------------------------------------------------------------|------------------|---------------------------|-------------------|
| 1        | 5.2                  | CH <sub>3</sub> -SO(CH <sub>2</sub> ) <sub>4</sub>                                   | DS-glucoraphanin<br>(DS-4-methylsulfinylbutyl GSL)                         | 357              | 380, 196                  | 1.07 <sup>1</sup> |
| 2        | 6.6                  | CH <sub>2</sub> =CH-CH <sub>2</sub> -                                                | DS-sinigrin (internal standard)<br>(DS-2-propenyl GSL)                     | 279              | 118, 302                  | 1.00 <sup>1</sup> |
| 3        | 11.8                 | C <sub>6</sub> H <sub>11</sub> O <sub>5</sub> -S-S-(CH <sub>2</sub> ) <sub>4</sub> - | DS-diglucothiobeinin<br>(DS-4-(β-D'glucopyranosyldisulfanyl)<br>butyl GSL) | 521              | 522, 544                  | 1.00 <sup>2</sup> |
| 4        | 12.2                 | CH <sub>3</sub> -S-(CH <sub>2</sub> ) <sub>3</sub>                                   | DS-glucoibervirin<br>(DS-3-Methylthiopropyl )                              | 327              | 166, 350                  | 0.80 <sup>1</sup> |
| 5        | 16.0                 | CH <sub>3</sub> -S-(CH <sub>2</sub> ) <sub>4</sub> -                                 | DS-glucoerucin<br>(DS-4-methylthiobutyl GSL)                               | 341              | 180, 364                  | 1.04 <sup>1</sup> |
| 6        | 17.7                 | -S-(CH <sub>2</sub> ) <sub>4</sub>                                                   | DS-glucosativin<br>(DS-4-mercaptobutyl)                                    | 327              | 349, 327                  | 1.00 <sup>2</sup> |
| 7        | 18.8                 | -(CH <sub>2</sub> ) <sub>4</sub> -S-S-(CH <sub>2</sub> ) <sub>4</sub>                | DS-DMBGLS<br>(DS-dimeric 4-mercaptobutyl GSL)                              | 652              | 653, 490                  | 1.00 <sup>2</sup> |
